# Supplementary material for: Heteroaromatic Swapping in Aromatic Ketones
Source: Research Square preprint supplement (doi:10.21203/rs.3.rs-5583133/v1), 2025-04-17
Supplement: Supplementary file 1 [file 7c3bf6d12ae5cf6640abde17.pdf]

## checkCIF (basic structural check) running

Checking for embedded fcf data in CIF ...

Found embedded fcf data in CIF. Extracting fcf data from uploaded CIF, please wait . .

## checkCIF/PLATON (basic structural check)

Structure factors have been supplied for datablock(s) HN2980

THIS REPORT IS FOR GUIDANCE ONLY. IF USED AS PART OF A REVIEW PROCEDURE FOR PUBLICATION, IT SHOULD NOT REPLACE THE EXPERTISE OF AN EXPERIENCED CRYSTALLOGRAPHIC REFEREE.

No syntax errors found. [CIF dictionary](#)

Please wait while processing .... [Interpreting this report](#)

### Structure factor report

## Datablock: HN2980

|                 |                                               |                    |
|-----------------|-----------------------------------------------|--------------------|
| Bond precision: | C-C = 0.0049 Å                                | Wavelength=1.54184 |
| Cell:           | a=6.49997(14)    b=11.1943(3)    c=14.0113(3) |                    |
|                 | alpha=90    beta=95.358(2)    gamma=90        |                    |
| Temperature:    | 100 K                                         |                    |

|                        | Calculated                | Reported                  |
|------------------------|---------------------------|---------------------------|
| Volume                 | 1015.04(4)                | 1015.05(4)                |
| Space group            | P n                       | P 1 n 1                   |
| Hall group             | P -2yac                   | P -2yac                   |
| Moiety formula         | C20 H23 Cl N2 O2, 2(H2 O) | C20 H23 Cl N2 O2, 2(H2 O) |
| Sum formula            | C20 H27 Cl N2 O4          | C20 H27 Cl N2 O4          |
| Mr                     | 394.89                    | 394.88                    |
| Dx, g cm <sup>-3</sup> | 1.292                     | 1.292                     |
| Z                      | 2                         | 2                         |
| Mu (mm <sup>-1</sup> ) | 1.895                     | 1.895                     |
| F000                   | 420.0                     | 420.0                     |
| F000'                  | 421.91                    |                           |
| h,k,lmax               | 8,13,17                   | 7,13,17                   |
| Nref                   | 4029[ 2021]               | 2216                      |
| Tmin,Tmax              | 0.651,0.876               | 0.399,1.000               |
| Tmin'                  | 0.201                     |                           |

Correction method= # Reported T Limits: Tmin=0.399 Tmax=1.000  
AbsCorr = MULTI-SCAN

Data completeness= 1.10/0.55    Theta(max)= 72.781

R(reflections)= 0.0468( 2135)    wR2(reflections)= 0.1220( 2216)

S = 1.024    Npar= 259

The following ALERTS were generated. Each ALERT has the format

**test-name\_ALERT\_alert-type\_alert-level.**

Click on the hyperlinks for more details of the test.

### Alert level C

[PLAT340\\_ALERT\\_3\\_C](#) Low Bond Precision on C-C Bonds ..... 0.00489 Ang.

[PLAT417\\_ALERT\\_2\\_C](#) Short Inter D-H..H-D H26B ..H27A . 2.14 Ang.

x,y,z = 1\_555 Check

[PLAT911\\_ALERT\\_3\\_C](#) Missing FCF Refl Between Thmin & STh/L= 0.600 27 Report

6 0 0, 0 12 0, -5 0 1, 5 0 1, 6 0 2, 5 0 3,

0 13 3, 4 0 4, 6 0 4, 4 5 4, 0 13 4, -5 0 5,  
 5 0 5, 7 0 5, -2 12 5, 6 0 6, 5 0 7, -4 0 8,  
 4 0 8, 5 7 8, -3 0 9, -6 5 9, 3 9 10, 4 3 13,  
 -1 6 15, 0 0 16, -1 4 16,

PLAT975\_ALERT\_2\_C Check Calcd Resid. Dens. 0.83Ang From O19 . 0.40 eA-3

## Alert level G

PLAT002\_ALERT\_2\_G Number of Distance or Angle Restraints on AtSite 6 Note  
 PLAT007\_ALERT\_5\_G Number of Unrefined Donor-H Atoms ..... 1 Report  
 H19  
 PLAT063\_ALERT\_4\_G Crystal Size Possibly too Large for Beam Size .. 0.82 mm  
 PLAT072\_ALERT\_2\_G SHELXL First Parameter in WGHT Unusually Large 0.10 Report  
 PLAT172\_ALERT\_4\_G The CIF-Embedded .res File Contains DFIX Records 2 Report  
 PLAT173\_ALERT\_4\_G The CIF-Embedded .res File Contains DANG Records 2 Report  
 PLAT650\_ALERT\_4\_G SWAT Instruction Used to Model Solvent Disorder ! Report  
 PLAT860\_ALERT\_3\_G Number of Least-Squares Restraints ..... 8 Note  
 PLAT912\_ALERT\_4\_G Missing # of FCF Reflections Above STh/L= 0.600 61 Note  
 PLAT915\_ALERT\_3\_G No Flack x Check Done: Low Friedel Pair Coverage 14 %  
 PLAT941\_ALERT\_3\_G Average HKL Measurement Multiplicity ..... 2.5 Low  
 PLAT969\_ALERT\_5\_G The 'Henn et al.' R-Factor-gap value ..... 2.670 Note  
 Predicted wR2: Based on SigI\*\*2 4.57 or SHELX Weight 11.92  
 PLAT978\_ALERT\_2\_G Number C-C Bonds with Positive Residual Density. 4 Info

0 **ALERT level A** = Most likely a serious problem - resolve or explain  
 0 **ALERT level B** = A potentially serious problem, consider carefully  
 4 **ALERT level C** = Check. Ensure it is not caused by an omission or oversight  
 13 **ALERT level G** = General information/check it is not something unexpected

0 ALERT type 1 CIF construction/syntax error, inconsistent or missing data  
 5 ALERT type 2 Indicator that the structure model may be wrong or deficient  
 5 ALERT type 3 Indicator that the structure quality may be low  
 5 ALERT type 4 Improvement, methodology, query or suggestion  
 2 ALERT type 5 Informative message, check

It is advisable to attempt to resolve as many as possible of the alerts in all categories. Often the minor alerts point to easily fixed oversights, errors and omissions in your CIF or refinement strategy, so attention to these fine details can be worthwhile. In order to resolve some of the more serious problems it may be necessary to carry out additional measurements or structure refinements. However, the purpose of your study may justify the reported deviations and the more serious of these should normally be commented upon in the discussion or experimental section of a paper or in the "special\_details" fields of the CIF. checkCIF was carefully designed to identify outliers and unusual parameters, but every test has its limitations and alerts that are not important in a particular case may appear. Conversely, the absence of alerts does not guarantee there are no aspects of the results needing attention. It is up to the individual to critically assess their own results and, if necessary, seek expert advice.

### Publication of your CIF in IUCr journals

A basic structural check has been run on your CIF. These basic checks will be run on all CIFs submitted for publication in IUCr journals (*Acta Crystallographica*, *Journal of Applied Crystallography*, *Journal of Synchrotron Radiation*); however, if you intend to submit to *Acta Crystallographica Section C* or *E* or *IUCrData*, you should make sure that **full publication checks** are run on the final version of your CIF prior to submission.

### Publication of your CIF in other journals

Please refer to the *Notes for Authors* of the relevant journal for any special instructions relating to CIF submission.

PLATON version of 22/08/2024; check.def file version of 21/08/2024

## Datablock HN2980 - ellipsoid plot

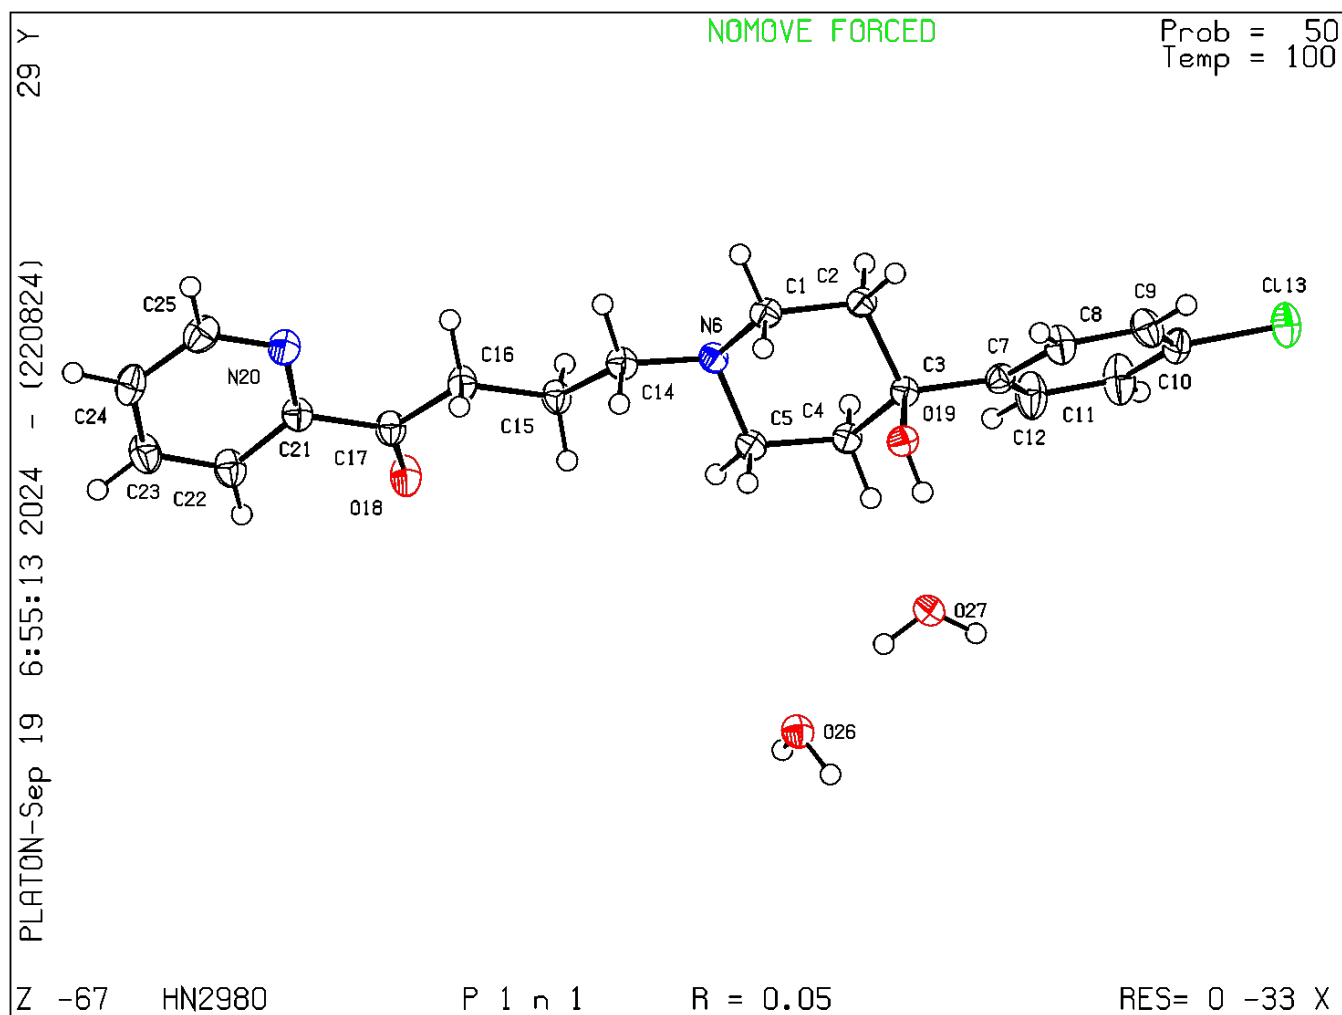

[Download CIF editor \(pubCIF\) from the IUCr](#)  
[Download CIF editor \(enCIFer\) from the CCDC](#)  
[Test a new CIF entry](#)
